# Supplementary material for: Porosity modeling in a TiNbTaZrMo high-entropy alloy for biomedical applications
Source: Royal Society of Chemistry journal article supplement (doi:10.1039/d3ra07313k), 2023-01-01
Supplement: d3ra07313k1.pdf [file d3ra07313k1.pdf]

# Electronic Supplementary Information for Porosity modeling in a TiNbTaZrMo high-entropy alloy for biomedical applications

Saro San<sup>a</sup>, Puja Adhikari<sup>a</sup>, Ridwan Sakidja<sup>b</sup>, Jamieson Brechtl<sup>c</sup>, Peter K Liaw<sup>d</sup>, and Wai-Yim Ching<sup>a\*</sup>

*a. Department of Physics and Astronomy, University of Missouri Kansas City, Kansas City MO, 64110, USA*

*b. Department of Physics, Astronomy and Materials Science, Missouri State University, Springfield, MO 65897, USA*

*c. Buildings and Transportation Science Division, Oak Ridge National Laboratory, Oak Ridge, TN, 37830, USA*

*d. Department of Materials Science and Engineering, The University of Tennessee, Knoxville, TN, 37996-2100, USA*

\* Corresponding author.

E-mail address: chingw@umkc.edu

## Supplementary Figures

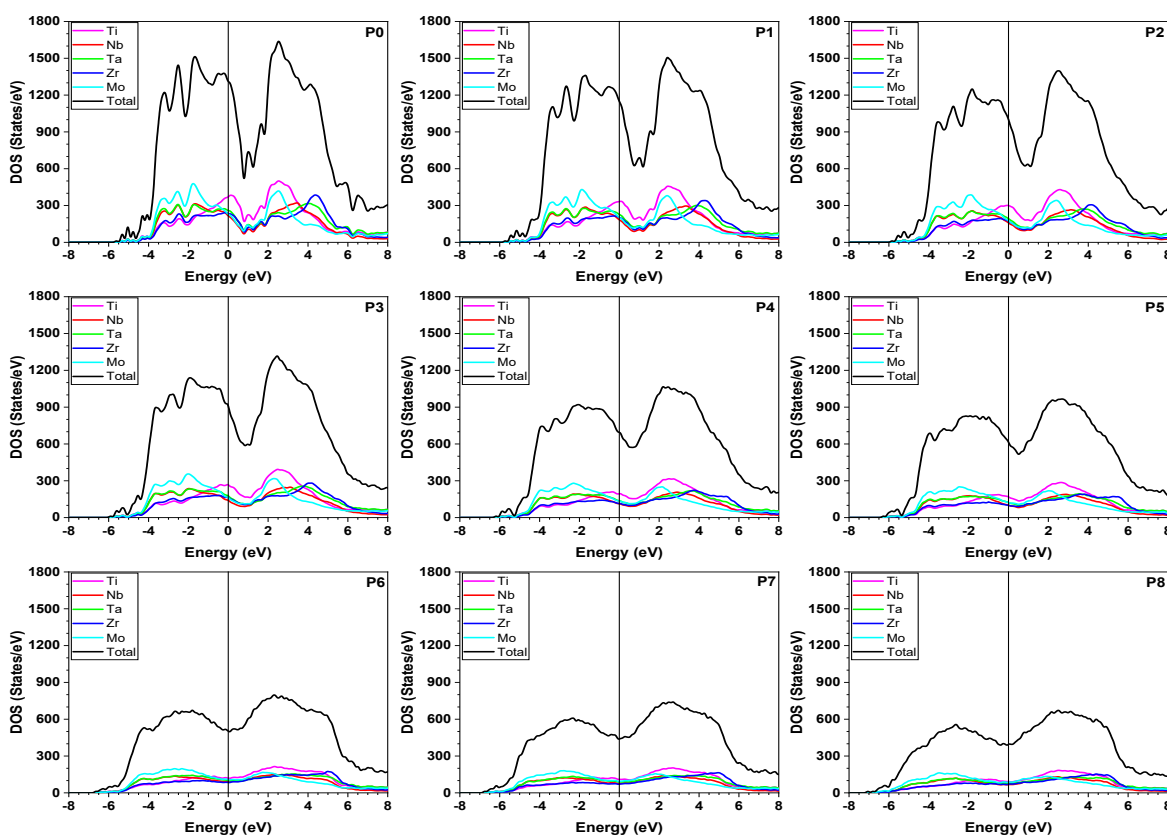

Figure S1. Density of states of porosity, as determined from porosity models P0-P8.

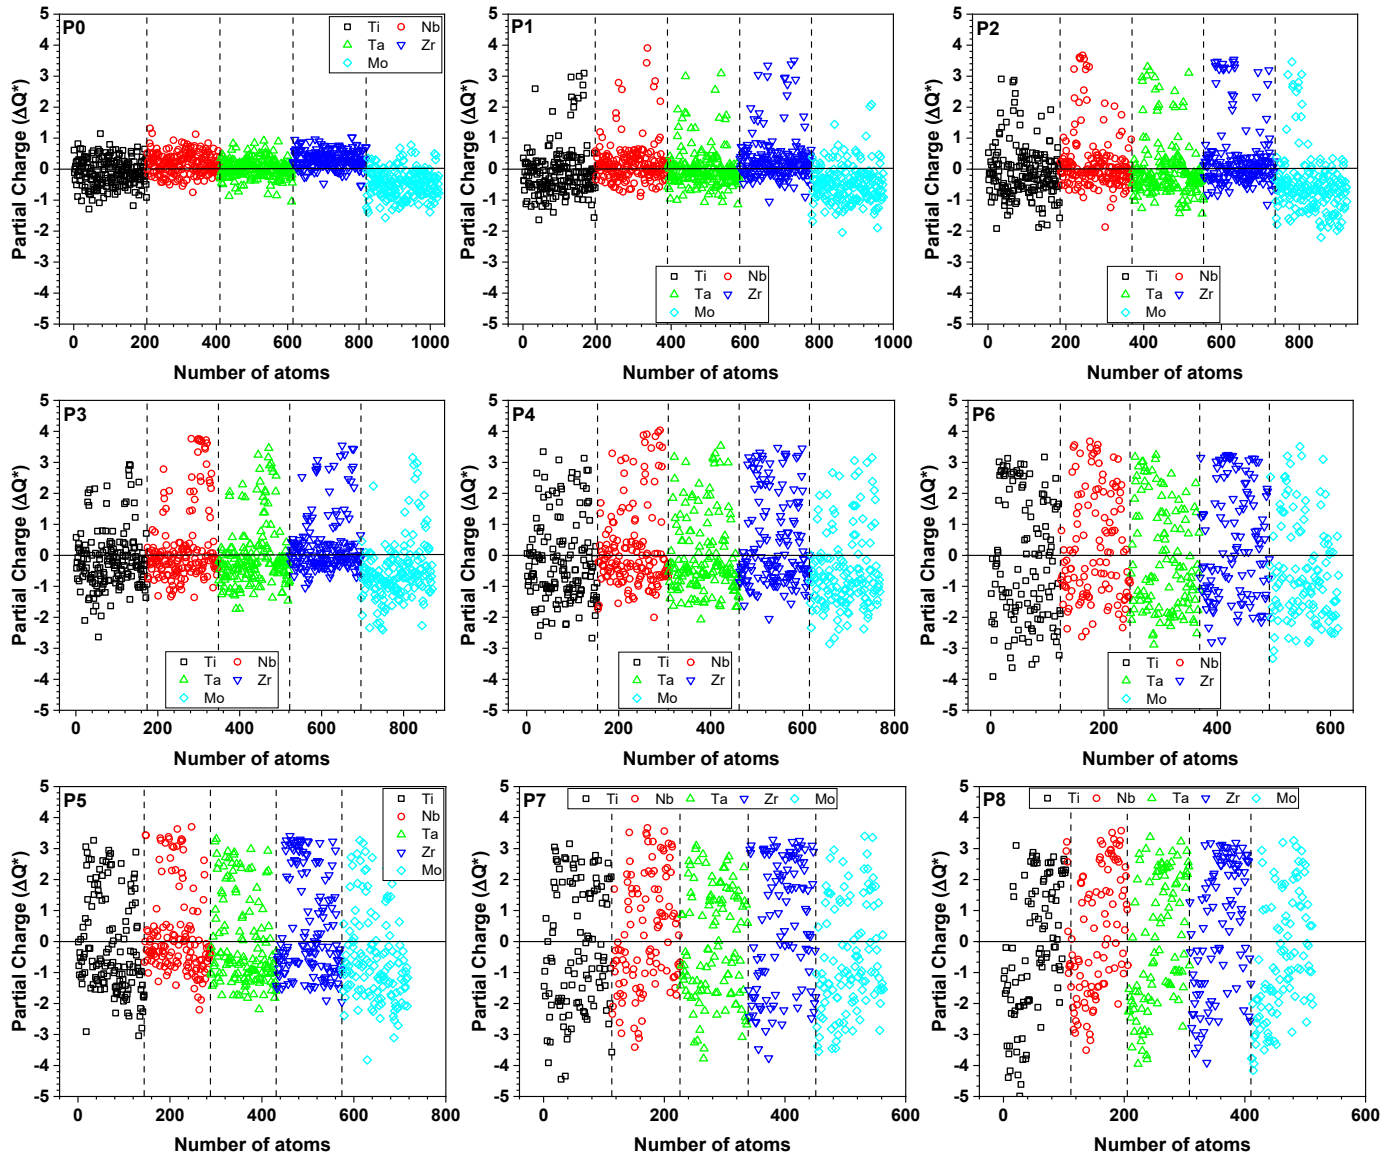

Figure S2. Partial charge of porosity, as determined from porosity models P0-P8.

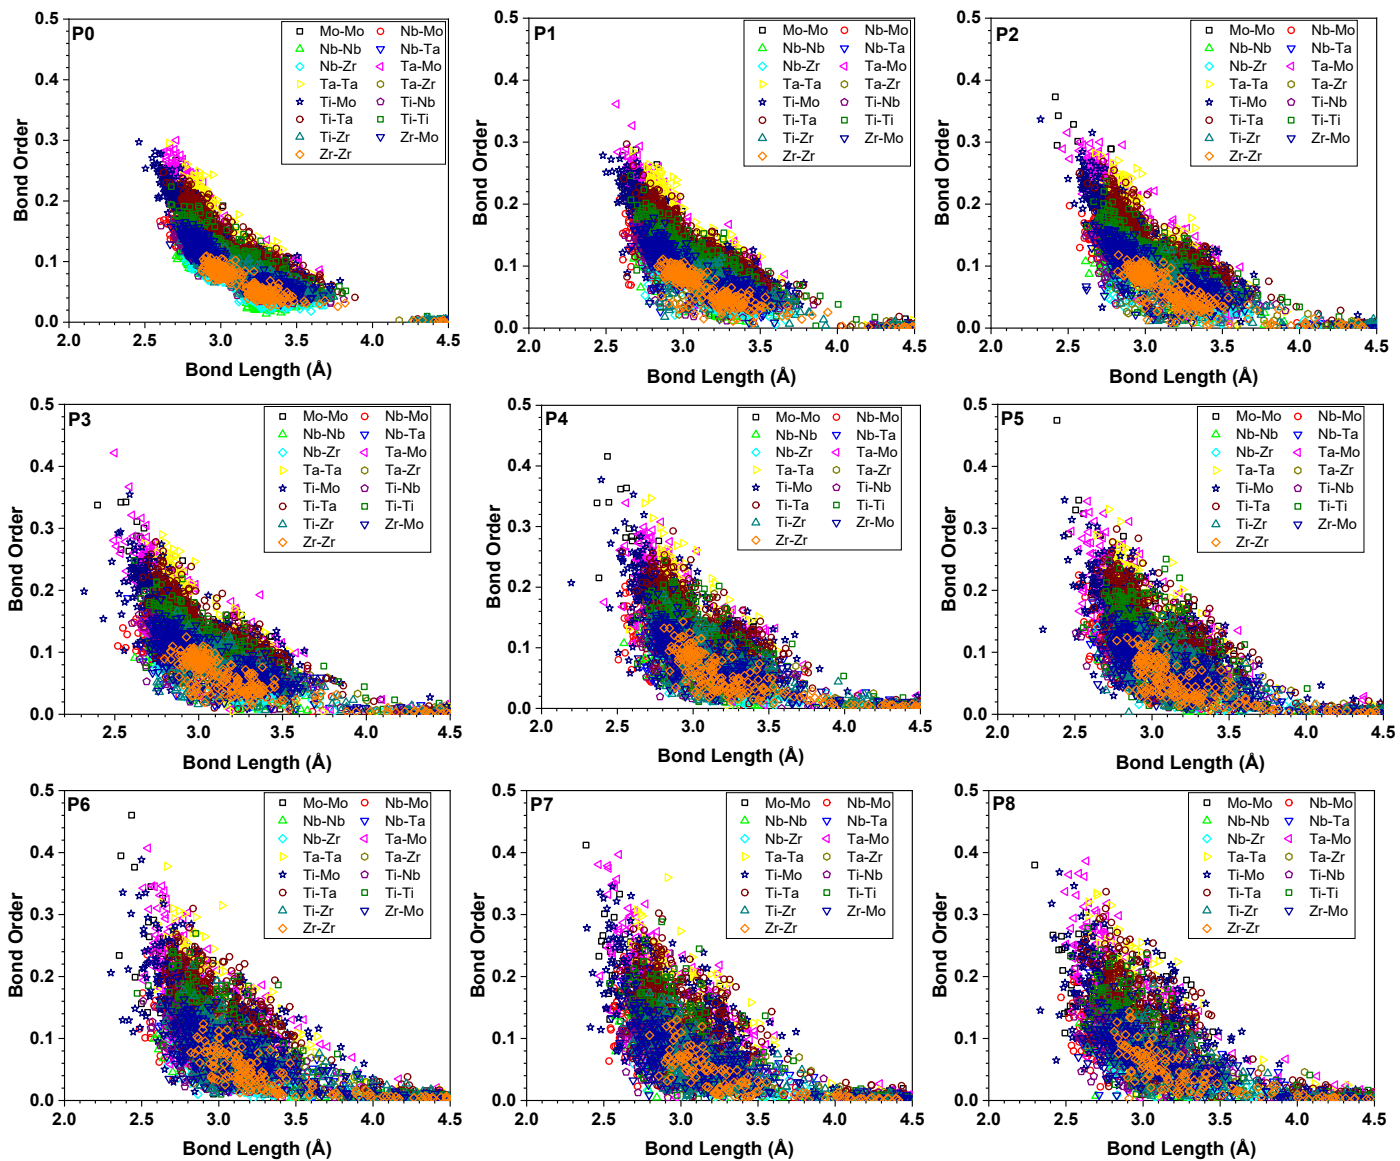

Figure S3. Bond order versus bond length of porosity, as determined from porosity models from P0-P8.

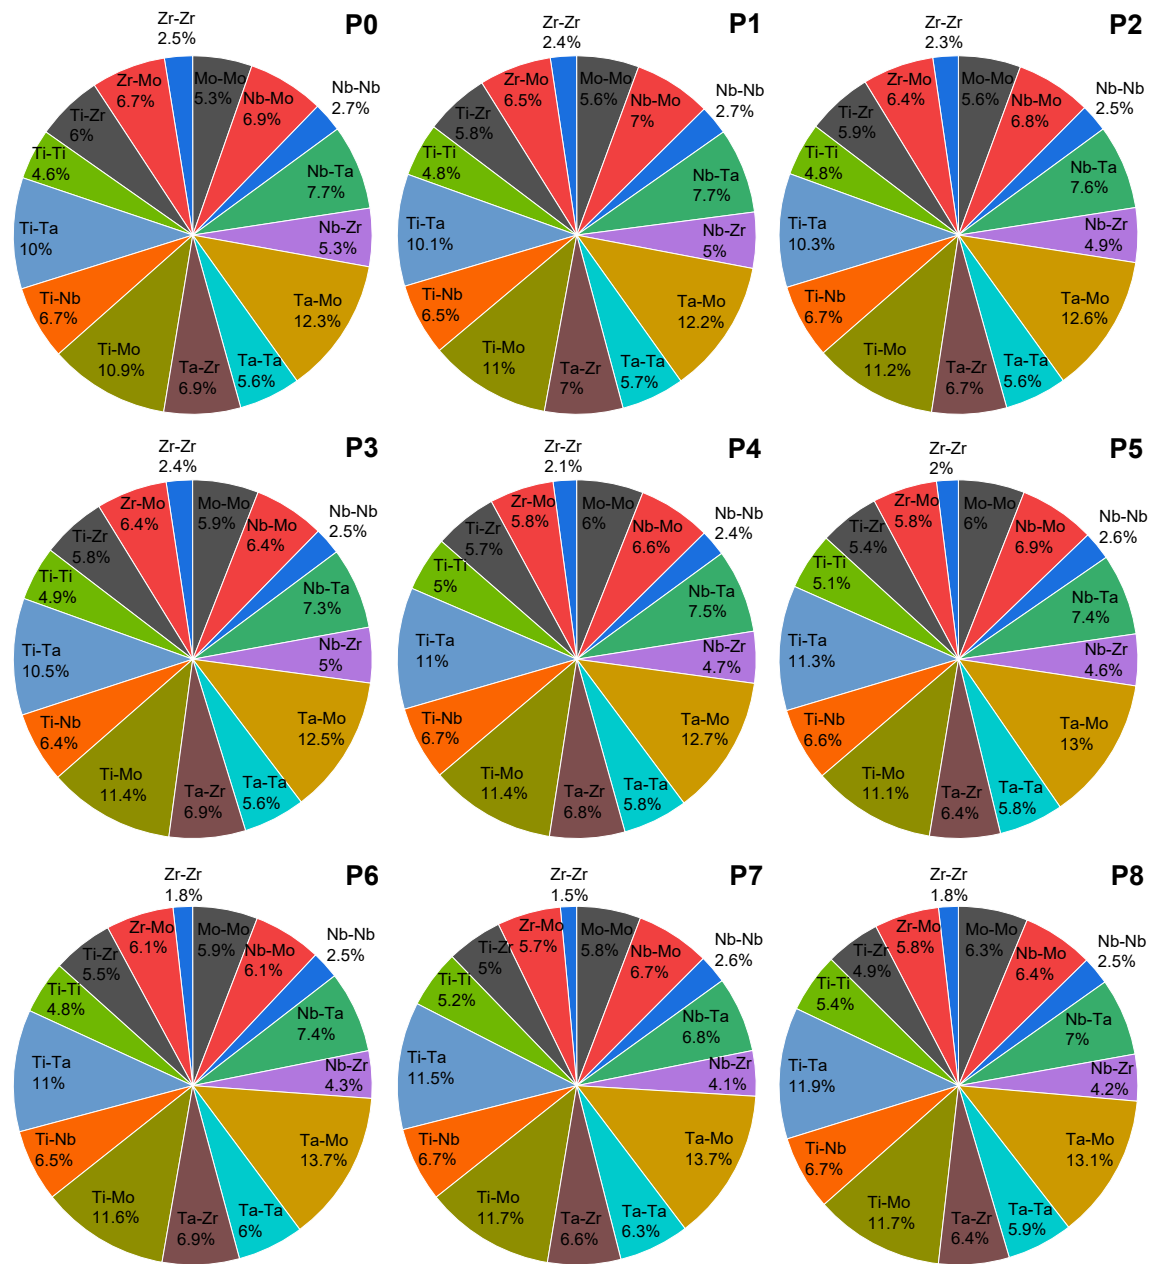

Figure S4. Pair-distribution contributions of each pair, as determined from porosity models, P0-P8.
